# Supplementary material
Source: PubMed Central journal article supplement (PMC6139036)
Supplement: NIHMS972105-supplement-S1.pdf [file NIHMS972105-supplement-S1.pdf]

**Supplementary Figure S1.** Participant *PIK3CA*-mutation central testing results

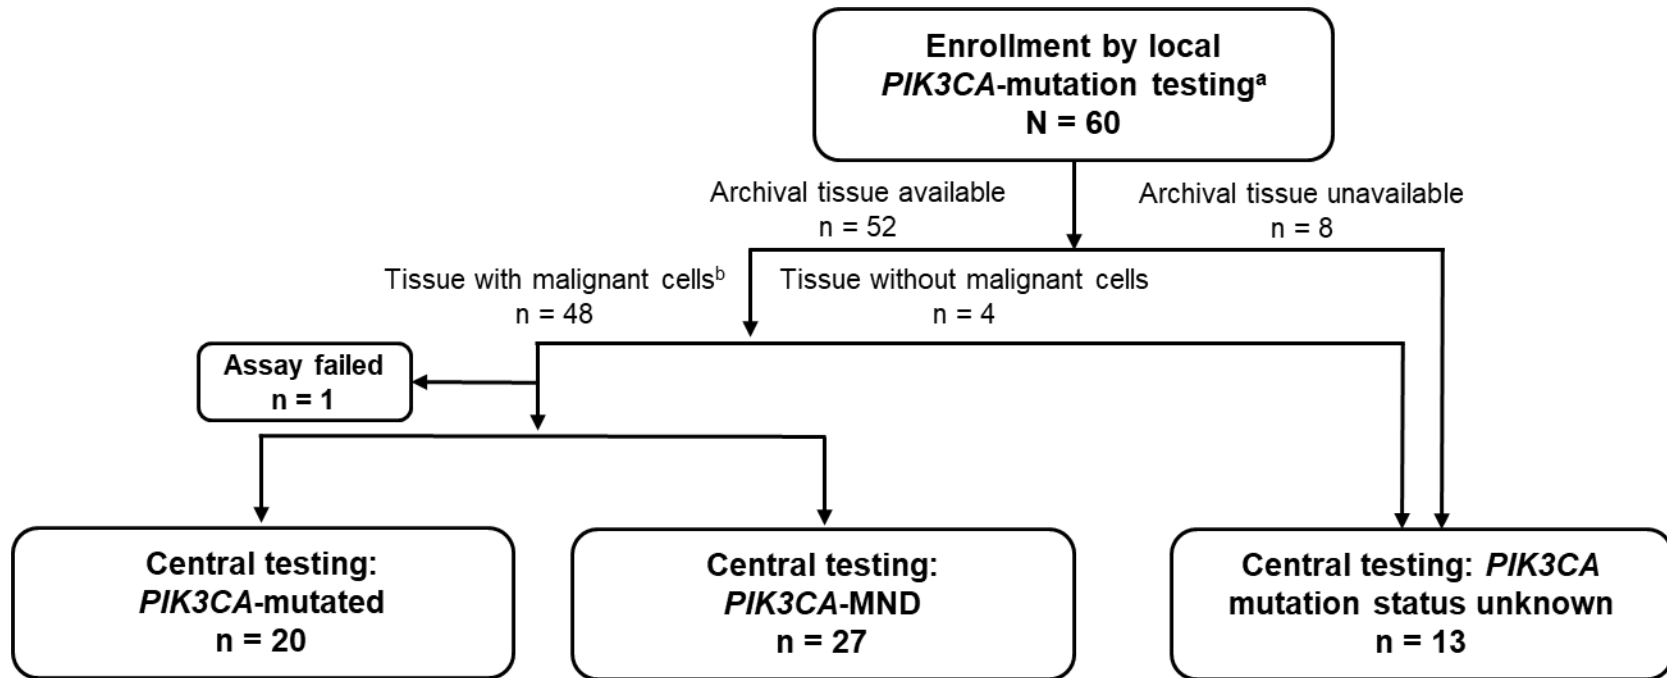

<sup>a</sup>Minimum of 30 patients with *PIK3CA* mutations required.

<sup>b</sup>One *PIK3CA* mutation assay failed.

MND, mutation not detected; *PIK3CA*, phosphatidylinositol-4,5-bisphosphate 3-kinase, catalytic subunit- $\alpha$ .
