# Supplementary material
Source: PubMed Central journal article supplement (PMC6139036)
Supplement: NIHMS972105-supplement-S2.pdf [file NIHMS972105-supplement-S2.pdf]

**Supplementary Figure S2.** Time on treatment by taselesib dose and duration

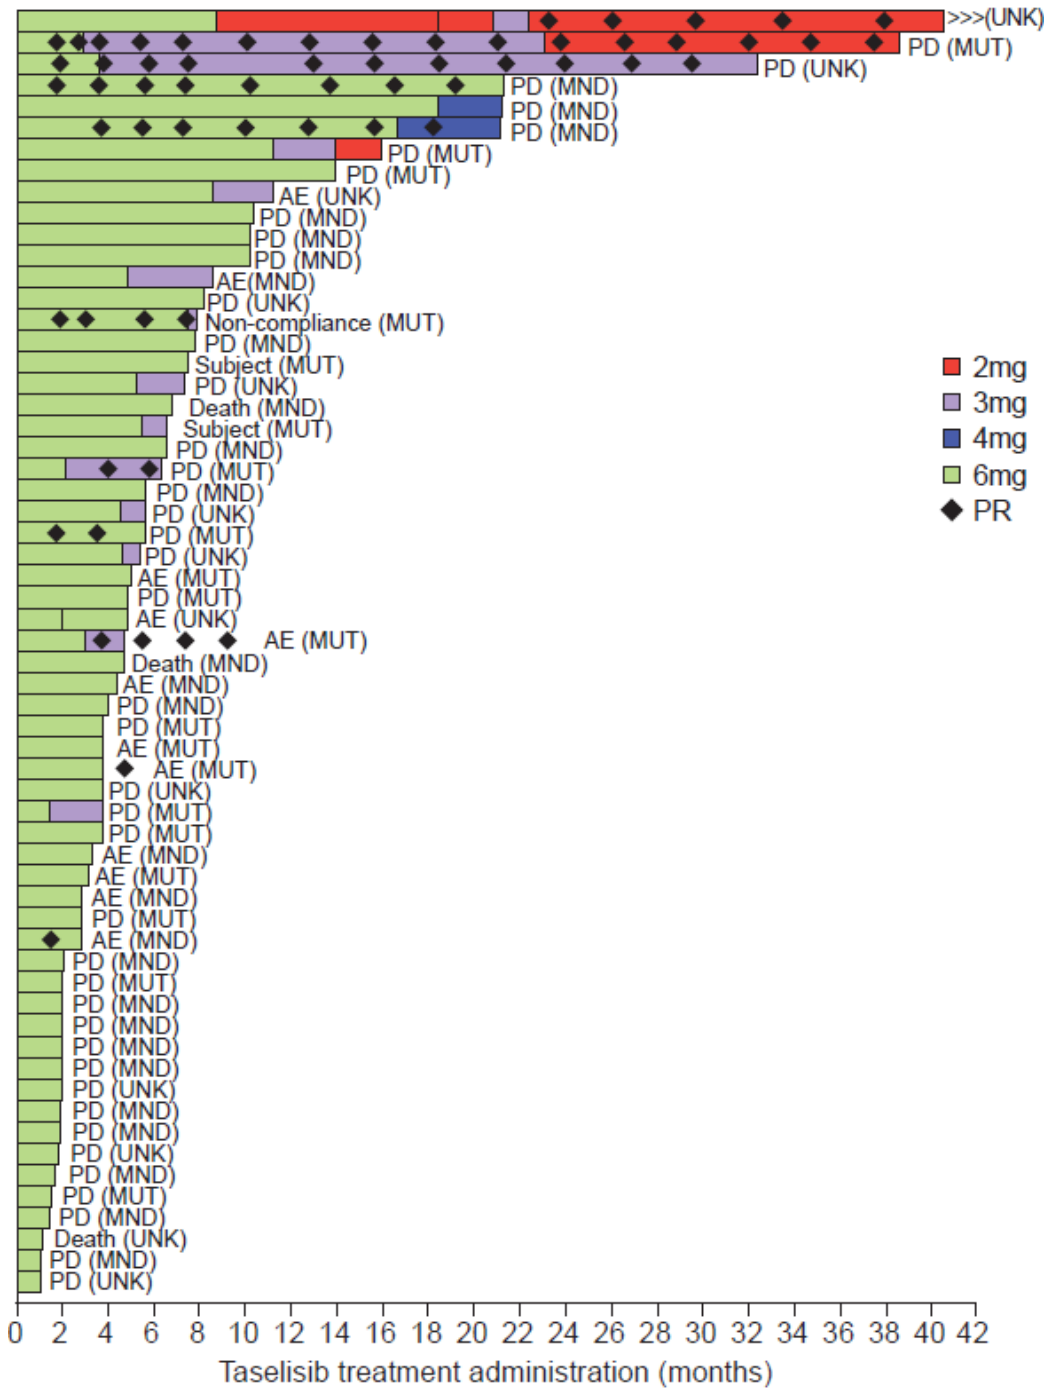

AE, adverse event; MND, mutation not detected; MUT, *PIK3CA*-mutated; PD, progressive disease; *PIK3CA*, phosphatidylinositol-4,5-bisphosphate 3-kinase, catalytic subunit- $\alpha$ ; PR, partial response; UNK, unknown *PIK3CA* mutation status; >>> indicates treatment ongoing at time of data cutoff.
