# Supplementary material
Source: PubMed Central journal article supplement (PMC6139036)
Supplement: NIHMS972105-supplement-Supplementary_Methods.pdf [file NIHMS972105-supplement-Supplementary_Methods.pdf]

## **Supplemental Methods**

### **Definition of adverse events of special interest (AESI)**

All AESI categories were encoded using the Medical Dictionary for Regulatory Activities (MedDRA) version 20.0.

**Colitis** comprised the preferred terms allergic colitis, colitis, colitis erosive, enterocolitis, colitis microscopic, colitis ulcerative, enterocolitis hemorrhagic, eosinophilic colitis, inflammatory bowel disease, neutropenic colitis, autoimmune colitis, and segmental diverticular colitis.

**Pneumonitis** comprised the preferred terms acute interstitial pneumonitis, alveolar lung disease, alveolar proteinosis, alveolitis, alveolitis allergic, alveolitis necrotising, bronchiolitis, combined pulmonary fibrosis and emphysema, diffuse alveolar damage, eosinophilia myalgia syndrome, eosinophilic granulomatosis with polyangiitis, eosinophilic pneumonia, eosinophilic pneumonia acute, eosinophilic pneumonia chronic, idiopathic interstitial pneumonia, idiopathic pneumonia syndrome, idiopathic pulmonary fibrosis, interstitial lung disease, lung infiltration, necrotizing bronchiolitis, obliterative bronchiolitis, pneumonitis, progressive massive fibrosis, pulmonary fibrosis, pulmonary necrosis, pulmonary radiation injury, pulmonary toxicity, pulmonary vasculitis, radiation alveolitis, radiation fibrosis - lung, radiation pneumonitis, respiratory syncytial virus bronchiolitis, and transfusion-related acute lung injury.

**Hyperglycemia** comprised the preferred terms hyperglycemia and blood glucose increased.

**Stomatitis** comprised the preferred terms aphthous ulcer, glossitis, glossodynia, lip ulceration, mouth ulceration, mucosal inflammation, mucosal toxicity, palatal ulcer, pyostomatitis vegetans, stomatitis, stomatitis hemorrhagic, stomatitis necrotizing.

**Diarrhea** comprised the preferred terms diarrhea, defecation urgency, anal incontinence, and frequent bowel movements.

**Rash** comprised the preferred terms dermatitis, dermatitis allergic, dermatitis bullous, dermatitis exfoliative, dermatitis exfoliative generalized, drug eruption, erythema, exfoliative rash, eyelid rash, folliculitis, generalized erythema, hand dermatitis, rash, rash erythematous, rash follicular, rash generalized, rash macular, rash maculo-papular, rash maculovesicular, rash morbilliform, rash papular, rash papulosquamous, rash pruritic, rash pustular, rash vesicular, symmetrical drug-related intertriginous and flexural exanthema, and toxic skin eruption.
