# Supplementary material
Source: PubMed Central journal article supplement (PMC6139036)
Supplement: NIHMS972105-supplement-Table_S1.pdf [file NIHMS972105-supplement-Table_S1.pdf]

**Supplementary Table S1.** Study disposition

| Patients, <i>n</i> (%) | <i>PIK3CA</i> -<br>mutated<br>( <i>n</i> = 20) | <i>PIK3CA</i> -<br>MND<br>( <i>n</i> = 27) | <i>PIK3CA</i><br>mutation<br>status<br>unknown<br>( <i>n</i> = 13) | All patients<br>( <i>N</i> = 60) |
|------------------------|------------------------------------------------|--------------------------------------------|--------------------------------------------------------------------|----------------------------------|
| Discontinued study     | 17 (85.0)                                      | 18 (66.7)                                  | 7 (53.8)                                                           | 42 (70.0)                        |
| Death                  | 14 (70.0)                                      | 17 (63.0)                                  | 5 (38.5)                                                           | 36 (60.0)                        |
| Lost to follow-up      | 3 (15.0)                                       | 1 (3.7)                                    | 0                                                                  | 4 (6.7)                          |
| Withdrawal of patient  | 0                                              | 0                                          | 2 (15.4)                                                           | 2 (3.3)                          |

MND, mutation not detected; *PIK3CA*, phosphatidylinositol-4,5-bisphosphate 3-kinase, catalytic subunit-alpha.
