# Supplementary material
Source: PubMed Central journal article supplement (PMC6139036)
Supplement: NIHMS972105-supplement-Table_S3.pdf [file NIHMS972105-supplement-Table_S3.pdf]

**Supplementary Table S3.** Adverse events (AEs) of special interest in the safety population

|                            | All patients     |
|----------------------------|------------------|
| All grades, <i>n</i> (%)   | ( <i>N</i> = 60) |
| Any AE of special interest | 48 (80.0)        |
| Diarrhea                   | 42 (70.0)        |
| Colitis                    | 14 (23.3)        |
| Colitis                    | 13 (21.7)        |
| Enterocolitis              | 1 (1.7)          |
| Stomatitis                 | 25 (41.7)        |
| Mucosal inflammation       | 17 (28.3)        |
| Stomatitis                 | 11 (18.3)        |
| Rash                       | 18 (30.0)        |
| Rash                       | 15 (25.0)        |
| Rash, maculopapular        | 5 (8.3)          |
| Erythema                   | 1 (1.7)          |
| Folliculitis               | 1 (1.7)          |
| Hyperglycemia              | 13 (21.7)        |
| Pneumonitis                | 1 (1.7)          |

All AEs were encoded using Medical Dictionary for Regulatory Activities (MedDRA) version 20.0. Multiple occurrences of the same AE in one individual were counted once at the highest grade for this preferred term. For AEs of special interest, each patient contributed once for each grade, with the highest grade of AE reported.
